## Appendix 1. The OPVI Trial Group

### OPVI-Participating Clinical Centers:

Caen University Hospital, Caen, France (Sandrine Lemoine, M.D., Ph.D., Jean-Luc Hanouz, M.D., Ph.D., Georges Daccache, M.D., Ph.D., William Greub, M.D., Michel Pegoix, M.D., Maxence Le Goff Coupervnot, M.D., Marc-Olivier Fischer, M.D., Ph.D.); Amiens Picardie University Hospital, Amiens, France (Diane Taing, M.D., Ossama About Arab, M.D., Stéphane Bar, M.D., Emmanuel Lorne, M.D., Ph.D.); Lille University Hospital, Lille, France (Marion Houard, M.D., Serge-André Carron, M.D., Arnaud Alluin, M.D., Benoît Tavernier, M.D., Ph.D.); Hospital of Catholic Institute of Lille, Lomme, France (Chems-Eddine

Bouchakour, M.D., Vincent Colas, M.D., Christophe Canevet, M.D.); and Rouen University Hospital, Rouen, France (Vincent Compère, M.D., Ph.D.).

### Data-monitoring Committee:

Clinical Research Department, Caen University Hospital (François Fournel, A.A.S., Blandine Lecrux, A.A.S., Sandrine Rot, A.A.S.); Clinical Research Department, Hospital of Catholic Institute of Lille (Domitille Tristam, A.A.S.); Clinical Research Department, Lille University Hospital (Artak Petrosyan, A.A.S., Julie Bellet, A.A.S.); Clinical Research Department, Amiens Picardie University Hospital (Sandrine Brisset, A.A.S.).

## ANESTHESIOLOGY REFLECTIONS FROM THE WOOD LIBRARY-MUSEUM

### The Surgeon As “Swindler”: A Corny Use of Chloroform

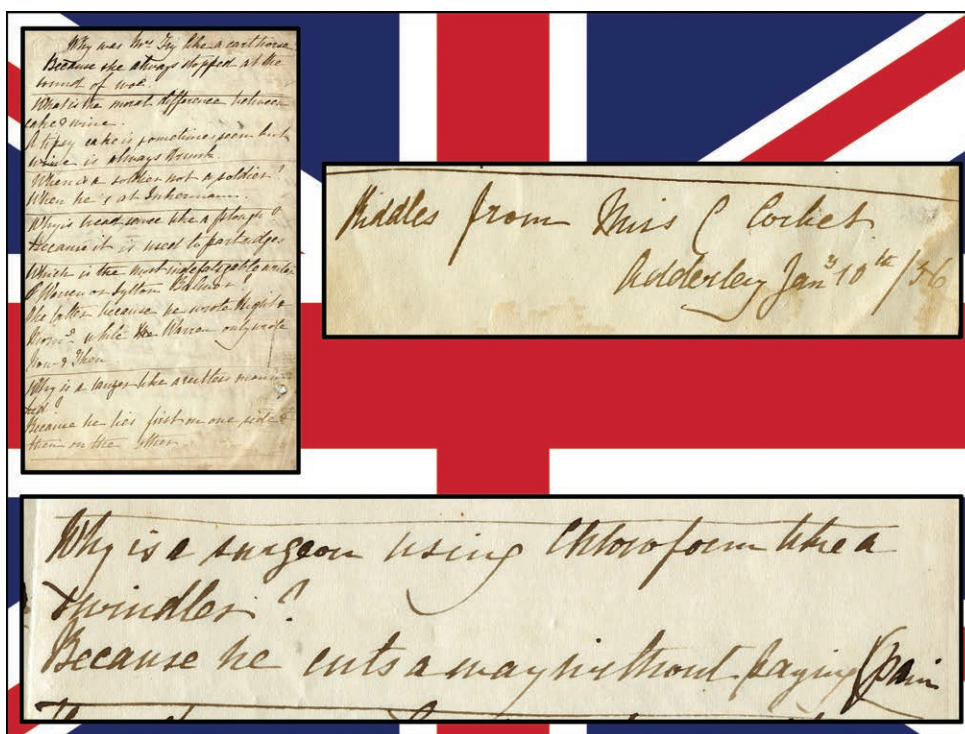

Hidden in the Wood Library-Museum Archives is this bifold sheet (top left) containing three autograph pages of “Riddles from Miss C. Corbet” of Adderley, England. Dated “Jan<sup>y</sup> 10<sup>th</sup> / 56” (1856, top right), there are 19 riddles in all. The riddler was 20-year-old Clara Anna Corbet (1835 to 1916), the fourth of eight children born to soon-to-be Rector Richard Corbet and his wife Eleanor. In one instance, Clara likened “a surgeon using Chloroform,” who “cuts away without...pain,” to “a swindler,” who “cuts away without paying” (bottom). Miss Corbet, however, offered no chloroform to palliate the pain of reading her riddle. (Copyright © the American Society of Anesthesiologists’ Wood Library-Museum of Anesthesiology.)

Jane S. Moon, M.D., University of California, Los Angeles, and George S. Bause, M.D., M.P.H., Case Western Reserve University, Cleveland, Ohio.
